# Supplementary material
Source: PubMed Central journal article supplement (PMC3144279)
Supplement: NIHMS276569-supplement-Supp_Table_S1-S2.pdf [file NIHMS276569-supplement-Supp_Table_S1-S2.pdf]

# Supplementary Information for *MDAnalysis: A Toolkit for the Analysis of Molecular Dynamics Trajectories*

Naveen Michaud-Agrawal, Elizabeth J. Denning, Thomas B. Woolf, Oliver Beckstein

**Table S1:** Comparison of various computational software packages that are used to analyze molecular dynamics trajectories.

| package                                             | version  | license [1]      | open source [2] | languages (code) | command language [3] | modularity [4]                    | object-oriented [5] | volumetric data [6] | atom selection [7] | geometric transform ation [8] | visualizat ion            | simulation setup [9] | molecular simulations [10] | interactive use [11] |
|-----------------------------------------------------|----------|------------------|-----------------|------------------|----------------------|-----------------------------------|---------------------|---------------------|--------------------|-------------------------------|---------------------------|----------------------|----------------------------|----------------------|
| MDAnalysis                                          | 0.7      | GPL v2           | x               | Python, C        | Python               | library                           | x                   | x                   | x                  | x                             | -                         | -                    | -                          | x                    |
| CHARMM <sup>1</sup>                                 | 35b1     | non-free         | -               | FORTRAN          | CHARMM               | monolithic                        | -                   | x                   | x                  | x                             | -                         | x                    | x                          | -                    |
| ptraj (AmberTools) <sup>2</sup>                     | 1.4      | GPL              | x               | C                | ptraj                | monolithic                        | -                   | x                   | x                  | x                             | -                         | -                    | -                          | -                    |
| Gromacs <sup>3</sup>                                | 4.5.3    | GPL              | x               | C                | -                    | tools                             | -                   | x                   | -                  | -                             | -                         | x                    | x                          | -                    |
| LOOS <sup>4</sup>                                   | 1.5.5    | GPL              | x               | C++              | C++                  | library                           | x                   | x                   | x                  | x                             | -                         | -                    | -                          | -                    |
| MMTK <sup>5</sup>                                   | 2.7.3    | CeCILL           | x               | Python, C        | Python               | library                           | x                   | x                   | -                  | x                             | (external viewer or VRML) | x                    | x                          | x                    |
| WORDOM <sup>6</sup>                                 | 0.22     | GPL v2           | x               | C                | -/Python             | monolithic/ library (simple SWIG) | -                   | -                   | -                  | -                             | -                         | -                    | -                          | -                    |
| MD-TRACKS <sup>7</sup>                              | 0.004    | GPL v3           | x               | Python           | -                    | tools                             | -                   | -                   | -                  | -                             | -                         | -                    | -                          | -                    |
| Simulaid <sup>8</sup>                               |          | non-free         | -               | FORTRAN          | -                    | monolithic                        | -                   | -                   | -                  | -                             | x (only Irix)             | x                    | -                          | x                    |
| MMTSB <sup>9</sup>                                  | Aug 2008 | non-free         | -               | Perl, FORTRAN, C | -                    | tools                             | -                   | -                   | -                  | -                             | -                         | x                    | x                          | -                    |
| pymacs <sup>10</sup>                                | 0.4      | GPL v2 UIUC      | x               | Python, C        | Python               | library                           | x                   | -                   | -                  | x                             | -                         | x                    | -                          | x                    |
| VMD <sup>11</sup>                                   | 1.8.7    | Open             | x               | C, tcl           | tcl, Python          | monolithic                        | -                   | x                   | x                  | x                             | x                         | x                    | -                          | x                    |
| PyMOL <sup>12</sup>                                 | 1.3      | MIT              | x               | C                | PyMOL, Python        | monolithic                        | -                   | x                   | x                  | x                             | x                         | -                    | -                          | x                    |
| Chimera <sup>13</sup>                               | 1.5      | non-free         | -               | C++              | Chimera, Python      | monolithic                        | x                   | x                   | x                  | x                             | x                         | x                    | -                          | x                    |
| Adun <sup>14</sup>                                  | 0.81     | GPL              | x               | Objective-C      | SmallTalk            | framework                         | x                   | -                   | -                  | x                             | -                         | x                    | x                          | x                    |
| OpenStructure <sup>15</sup>                         | 1.0.1    | LGPL v3          | x               | C++, Python      | Python               | monolithic/library                | x                   | x                   | x                  | -                             | x                         | -                    | -                          | x                    |
| Python Macromolecular Library (mmLib) <sup>16</sup> | 1.0.0    | Artistic Licence | x               | Python, C        | Python               | library                           | x                   | -                   | -                  | x                             | x                         | -                    | -                          | -                    |
| Atomic Simulation Environment <sup>17</sup>         | 3.4.1    | LGPL v2.1        | x               | Python           | Python               | library                           | x                   | x                   | -                  | x                             | x                         | x                    | x                          | x                    |

[1] license: *GPL* is the open source GNU Public License; *LGPL* is the GNU Lesser General Public License; CeCILL (Cea Cnrs Inria Logiciel Libre) is an open source license used by French research institutions; *MIT* is a free software license originating from the Massachusetts Institute of Technology; for details on open source licenses see <http://www.opensource.org/licenses/index.html> . *non-free* is a specific license for the package that can be different for academic and commercial use but it always restricts the way in which the code can be used, modified, and republished

[2] open source means that source code is publicly available under a license in the spirit of the Open Source Definition <http://www.opensource.org/osd.html>

[3] computer language that is primarily used to carry out analysis tasks; often a scripting language. Not all packages contain a full-fledged "language" but a set of actions. Shell-scripting to join separate command line tools is not listed.

[4] modularity: How the packages is used typically: as a *library*, as a *framework* to build other tools, as a set of command line *tools*, or as a (effectively) *monolithic* program that controls all aspects of operation

[5] object-oriented: design focused on treating atoms/molecules/systems as objects

[6] volumetric data: capability to generate, process and/or read volumetric data such as densities or general fields

[7] atom selections: syntax to select atoms with descriptors and boolean combinations thereof (not just simple index files)

[8] geometric transformations: broad category that captures if it is possible to manipulate individual atoms and thus edit the system; many packages contain additional sophisticated model building capabilities

[9] simulation setup: Does the package contain special functionality to support the setting up of MD simulations?

[10] molecular simulations: Is it possible to run particle-based simulations with the package?

[11] interactive use: Does the package contain special functionality to support the interactive analysis of MD trajectories?



## References

1. Brooks, B. R.; Brooks III, C. L.; MacKerell Jr, A. D.; Nilsson, L.; Petrella, R. J.; Roux, B.; Won, Y.; Archontis, G.; Bartels, C.; Boresch, S.; Caflisch, A.; Caves, L.; Cui, Q.; Dinner, A. R.; Feig, M.; Fischer, S.; Gao, J.; Hodoscek, M.; Im, W.; Kuczera, K.; Lazaridis, T.; Ma, J.; Ovchinnikov, V.; Paci, E.; Pastor, R. W.; Post, C. B.; Pu, J. Z.; Schaefer, M.; Tidor, B.; Venable, R. M.; Woodcock, H. L.; Wu, X.; Yang, W.; York, D. M.; Karplus, M. *J Comp Chem* 2009, 30(10), 1545–1614.
2. Case, D. A.; Cheatham, r., Thomas E; Darden, T.; Gohlke, H.; Luo, R.; Merz, J., Kenneth M; Onufriev, A.; Simmerling, C.; Wang, B.; Woods, R. J. *J Comput Chem* 2005, 26(16), 1668–1688.
3. Hess, B.; Kutzner, C.; van der Spoel, D.; Lindahl, E. *J Chem Theo Comp* 2008, 4(3), 435–447.
4. Romo, T. D.; Grossfield, A. In 31st Annual International Conference of the IEEE EMBS: Minneapolis, Minnesota, USA, 2009, p 2332–2335.
5. Hinsen, K. *J Comput Chem* 2000, 21(2), 79–85.
6. Seeber, M.; Cecchini, M.; Rao, F.; Settanni, G.; Caflisch, A. *Bioinformatics* 2007, 23(19), 2625–2627.
7. Verstraelen, T.; Van Houteghem, M.; Van Speybroeck, V.; Waroquier, M. *J Chem Inform Model* 2008, 48(12), 2414–2424.
8. Mezei, M. *J Comput Chem* 2010, 31(14), 2658–2668.
9. Feig, M.; Karanicolas, J.; Brooks III, C. L. *J Mol Graph Model* 2004, 22(5), 377–395.
10. Seeliger, D.; de Groot, B. L. *Biophys J* 2010, 98(10), 2309-2316.
11. Humphrey, W.; Dalke, A.; Schulten, K. *J Mol Graph* 1996, 14, 33–38.
12. Schrodinger, LLC. 2010.
13. Pettersen, E. F.; Goddard, T. D.; Huang, C. C.; Couch, G. S.; Greenblatt, D. M.; Meng, E. C.; Ferrin, T. E. *J Comput Chem* 2004, 25(13), 1606–1612.
14. Johnston, M. A.; Galván, I. F.; Villà-Freixa, J. *J Comput Chem* 2005, 26(15), 1647-1659.
15. Biasini, M.; Mariani, V.; Haas, J.; Scheuber, S.; Schenk, A. D.; Schwede, T.; Philippsen, A. *Bioinformatics* 2010, 26(20), 2626-2628.
16. Painter, J.; Merritt, E. A. *J Appl Cryst* 2004, 37, 174-178.
17. Bahn, S. R.; Jacobsen, K. W. *Comput Sci Eng* 2002, 4, 56-66.
